# Supplementary material
Source: PubMed Central journal article supplement (PMC193530)
Supplement: pnas_1732547100_3.pdf [file pnas_1732547100_3.pdf]

**Table 4. Significant experiments for nocycling genes**

| Change         | Reference     | Experiment type         | Experiment details                                                              |
|----------------|---------------|-------------------------|---------------------------------------------------------------------------------|
| Up-regulated   | Gasch (1)     | Red/ox                  | 105 min 1 mM menadione / 105min wt                                              |
| Up-regulated   | Gasch (1)     | Red/ox                  | 180 min 2.5 mM DTT/180min DTT pool                                              |
| Up-regulated   | Gasch (1)     | Red/ox                  | 120 min 2.5 mM DTT/120min DTT pool                                              |
| Up-regulated   | Gasch (1)     | Red/ox                  | 40 min 1.5 mM diamide / 40 min wt                                               |
| Up-regulated   | Gasch (1)     | Red/ox                  | 50 min 1.5 mM diamide / 50 min wt                                               |
| Down-regulated | Gasch (1)     | Red/ox                  | 15 min 2.5 mM DTT/ 15min DTT pool                                               |
| Up-regulated   | Gasch (1)     | Starvation              | 6 hr YNB-AA/6hr wt                                                              |
| Up-regulated   | Gasch (1)     | Starvation              | 10hr YPD 30C / 10h wt                                                           |
| Up-regulated   | Gasch (1)     | Starvation              | 1 d YPD 25C / 1d wt                                                             |
| Up-regulated   | Gasch (1)     | Starvation              | 2% EtOH/EtOH Carbon pool                                                        |
| Down-regulated | Natarajan (2) | Starvation              | $\delta$ gcn4 100 mM 3AT/ $\delta$ gcn4 100 mM 3AT $\delta$ gcn4                |
| Up-regulated   | Jelinsky (3)  | Alpha factor            | G1 arrest - 0.3 uM $\alpha$ factor 120 min $\alpha$ factor/wt                   |
| Up-regulated   | Roberts (4)   | Alpha factor, pheromone | 90 min $\alpha$ factor, 50 nM/90min wt                                          |
| Up-regulated   | Roberts (4)   | Alpha factor, pheromone | 120 min $\alpha$ factor, 50 nM/120 min wt                                       |
| Down-regulated | Lyons (5)     | Zinc                    | Replete vs. deficient zinc / 3 mM 61 nM                                         |
| Down-regulated | Lyons (5)     | Zinc                    | Replete vs. deficient zinc / 3 mM 76 nM                                         |
| Down-regulated | Lyons (5)     | Zinc                    | $\delta$ zap1 excess vs. deficient zinc/ $\delta$ zap1 3 mM $\delta$ zap1 61 nM |
| Down-regulated | Lyons (5)     | Zinc                    | $\delta$ zap1 excess vs. deficient zinc, $\delta$ zap1 3 mM $\delta$ zap1 76 nM |
| Up-regulated   | Causton (6)   | Others                  | Alkali 80'/0'                                                                   |
| Down-regulated | Jelinsky (3)  | Others                  | 30 min 0.1% MMS/30 min wt                                                       |

The 20 expression experiments in which the set of nocycling genes identified by our algorithm were significantly correlated. See *Results and Discussion*.

- [1] Gasch, A.P. and Spellman, P.T. and Kao, C.M. and Carmel-Harel, O. and Eisen, M.B. and Storz, G. and Botstein, D. and Brown, P.O. (2000) *Mol. Biol. Cell* 11(12), 4241-4257
- [2] Natarajan, K. and Meyer, M.R. and Jackson, B.M. and Slade, D. and Roberts, C. and Hinnebusch A.G. and Marton, M.J. (2001) *Mol. Cell. Biol.* 21, 4347-4368
- [3] Jelinsky, S. and Estep, P. and Church, G. and Samson, L. D. (2000) *Mol. Cell. Biol.* 20 8157-67

- [4] Roberts, C.J. and Nelson, B. and Marton, M.J. and Stoughton, R. and Meyer, M.R. and Bennett, H.A. and He, Y.D. and Dai, H. and Walker, W.L. and Hughes, T.R. and Tyers and *et al* (2000) *Science* 287, 873-880
- [5] Lyons, T.J. and Gasch, A.P. and Gaither, L.A. and Botstein, D. and Brown, P.O. and Eide, D. (2000) *Proc. Natl. Acad. Sci. USA* 97, 7957-7962
- [6] Causton, H.C. and Ren, B. and Koh, S.S. and Harbison, C.T. and Kanin, E. and Jennings, E.G. and Lee, T. and True, H.L. and Lander, E.S. and Young, R.A. (2001) *Mol. Biol. Cell* 12, 323-337
